# Supplementary material
Source: publisher figshare collection journal article supplement (https://gsapubs.figshare.com/articles/dataset/_/14787828)
Supplement: Supplementary file 1 [file 2]

## Sheet: Table S1
This Supplemental Material accompanies Redwine, J.R., and
Adams, K.D., 2021, A 740,000-yr-long Mohawk Lake record,
Mohawk Valley, northeastern California, USA, in Starratt, S.W.,
and Rosen, M.R., eds., From Saline to Freshwater: The Diversity
of Western Lakes in Space and Time: Geological Society
of America Special Paper 536, https://doi.org/10.1130/2021.2536(21).
	Table S1. Stratigraphic Descriptions from sites in Mohawk Valley
Thickness (cm)	Site(s)	Unit	Description	Notes
	Willow Creek Section
~1,200	124	I	sand, no exposures	Not well exposed, but sand up to the bedrock knob
~1,200	124	H	tan, well- to sub-rounded, well-sorted, fine pebbles up to 3 cm and coarse sands, in ~2- to 4-cm-thick beds with rirregular sand lenses up to 10-cm-thick, interbedded with well sorted, coarse to medium sands and fine pebles, in tangential cross beds 1- to 10-cm-thick, and indurated, well-sorted sands and silts, lithologies are primarily rhyolite and granite.	top section
	125	H	tan, sub-rounded to sub-angular, well-sorted, pebbles up to 1 cm and coarse sands in tabular and tangential cross beds that are 5- to 25-cm-thick, and welll-rounded, very well-sorted fine to medium pebbles, in 10 cm to 1-m-thick beds, and lesser well-sorted, well-rounded to sub-angular, fine and medium sands that are moderatley indurated and primarily composed of granitic fragments. Most of the d…	loose, mica-rich section
	126	H	tan, well- to sub-rounded, well-sorted, fine to medium pebbles in ≤ 5-cm-thick beds interbedded with well to moderately well-sorted fine to medium sand in ~ 10-cm-thick beds.	loose, mica-rich section
	~1445 m unconformable contact with overlying looser and finer-grained sediment (Units H and I) overlying a thick section of indurated deposits (Units A-G).
~1,000	127 to 128	G	Reddish-orange, groundwater-stained, indurated, trough cross-bedded, very well-rounded, spherical, moderately well-sorted, imbricated, pebbles 1 to 6 cm indicating flow to the south. Troughs are 8 to 10-m-wide and up to 1-m-thick with 50 to 100-cm-thick bedsets composed of 2 to 10-cm-thick beds, and cut into and re-work the underlying units, lithologies are granitics, andesites, rhyolites. Interb…	indurated and slightly more coarse, more groundwater stained
~1-2	5	F - tephra bed description	The tephra bed lies below this upper contact, The uppper contact is planar and the tephra bed is moderately well to well sorted coarse sand-sized tephra, quartz, and mica in about 1 to 2-cm-thick beds and was interpreted to be somewhat re-worked because it is bedded. The tephra bed is near or about 30 cm below the upper contact, the position changes laterally. The contact and tephra are at 1436 m…	Planar contact, becoming a channel contact with an overlying coarser-grained gravel eroding into an overall finer and more indurated deposit. Tephra bed MV-5-F and JY-92-7 correlate to the Summer Lake tephra bed LL
~300+	5 to 257	F - unit description	The unit the tephra is within is at least 3-m-thick, light gray, tightly packed, well to sub-rounded, moderately sorted, silty fine sand with scattered very coarse sand to fine pebble quartz and mica and few coarse-sand and pebble filled channels that are looser in 0.5 to 1-m-thick bedsets composed of interbedded well to moderately well-sorted, well to sub-rounded, silty clay, fine sand and silt …
~150	5 to 257	D	Underlying are interbedded, irregular beds of dark (organic-rich?) silty clay 10 to 30-cm-thick, well sorted, rounded to sub-rounded, tangential tabular cross beds of fine to medium sand in 5 to 10-cm-thick bedsets of 1 to 3-cm-thick beds, well sorted, rounded to sub-rounded, medium sand and silty clay in contorted, discontinuous, lenticular beds 0.5 to 1-cm-thick with some planar and some wavy c…	E?
~2,500	257	C	At site 257, at about 1410 m, within the section described at 256 but upstream and to the NW, the section is a little finer-grained with smaller troughs. Troughs are 1.5 to 2-m-wide and 0.5 to 0.75-m-high filled with moderately sorted, well-rounded, spherical pebbles 0.5 to 2 cm in 10 to 20-cm-thick beds interbedded with well sorted, subangular to subrounded, coarse to medium, and lesser fine san…	D?
	134	C	This is the lateral equivalent of sites 255 to 257. This location is ~0.2 km to the east and would be further away from the main channel of paleo-Willow Creek. This is a smaller exposure and large trough cross beds were not apparent. In general this looked like horizontally bedded silts, sands, and gravels with some small channels that did not cut very deep, these channels may be trough cross bed…
	256	C	At site 256, extending up to ~ 1430 m, there are troughs about 2 to 3-m-wide, but as wide as 6 m that are mostly 0.5 to 1-m-thick and up to 2-m-thick. The base of the troughs are lined with well-sorted, tightly packed, fine sand and silt. Overlying are moderately well-sorted, well rounded, spherical, pebbles 2 to 5 cm and coarse sand. Some exposures show tangential tabular cross beds within the t…	tephra beds SAM 25A and B and JY-91-7 &8 correlate to the Dibekulewe ash 607 ±15 ka
~2,500	255	B	1398 m, the sediments are finer-grained. They are composed of moderately sorted coarse sand in 10 to 15-cm-thick beds lining the base of trough cross beds ~ 2-m-wide and up to 1-m-thick. Troughs are filled with well sorted coarse sands and pebbles 1 to 3 cm in 2 to 10-cm-thick beds. The package as a whole fines upwards and the troughs become larger
~150+	254	A	At site 254, at ~1381 m, there are well rounded, spherical, cobbles mostly 10 to 15 cm, rhyolite with some fine-grained silicic rocks, basalt, and andesite. This is within the section and below site 134 (~1414 m) where a finer-grained part of this section sits on bedrock upstream and to the east of Willow Creek. This relation is part of the evidence that these deposits were thicker east of Willow…
	Layman Canyon Section - All descriptions are for site 133
	133 - east side of fault		Top of section
875	133 - east side of fault	above tephra bed F	No detailed description	tephra beds MV-133-E, F, and RC 7 and 10 correlate to the Rockland ash 589 ±13 ka
25	133 - east side of fault	tephra bed F	No detailed description
20	133 - east side of fault	tephra bed E upper	Well-sorted, well-rounded, medium to coarse sand and pumice
80	133 - east side of fault	tephra bed E lower	Basal Rockland ash bed
300	133 - east side of fault	7	Well rounded, well-sorted, medium sands overlying sandy clay loam
10	133 - east side of fault	tephra(?) bed C	No detailed description	could be RD-02 tephra bed that correlates to the Dibukelewe ash
550	133 - east side of fault	3a and 3b	Interbedded moderately well-sorted sands with moderately well-sorted cobble beds up to 1-m-thick.
6	133 - east side of fault	tephra(?) bed B	No detailed description	could be RC-13 tephra bed that correlates to Thermal Canyon ash
250	133 - east side of fault	2b	Interbedded medium to coarse sands and fine pebbles and coarse sands in 5- to 10-cm-thick beds
250	133 - east side of fault	2a	Poorly sorted, fine-grained to coarse, 2 mm fine pebbles in fine to medium sand matrix, volcanic lithologies. Tan
225	133 - east side of fault	1	Poorly sorted, well to subangular, mostly subrounded to rounded, pebbles to boulders, 1 cm to 1 m, locally matrix supported, within sand, primarily clast supported though still poorly sorted. Clasts are severly weathered with thick weathering rinds and some lithologies completely weathered through. Lithologies: rhyolite, aphanitic andesite, other volcanics. Did not see a well-developed soil, was …
	133 - west side of fault
1300	133 - west side of fault	above tephra D	No detailed description
75	133 - west side of fault	tephra D	White tephra with black minerals within it overlying greenish-gray gravels and sands	tephra bed MV-133-D correlates to the Rockland ash
300/225	133 - west side of fault	6B / 6A (slightly more coarse-grained)	Interbedded gravels and sands. Well-rounded, fine pebbles to rare cobbles up to 10 cm within fine to coarse sands in 20- to 40-cm-thick bedsets. Mostly fine to medium, well- to sub-angular pebbles within groundwater stained, moderately sorted, fine to coarse sands in 10- to 25-cm-thick bedsets composed of well to sub-rounded pebbles up to 1 cm within coarse to medium sand, in 4- to 7-cm-thick bed…
400	133 - west side of fault	5	Medium pebbles and coarse sands in 20- to 50-cm-thick beds.
10	133 - west side of fault	tephra A	No detailed description	tephra bed MV-133-A correlates to Lava Creek B 631 ka
75	133 - west side of fault	4B	Greenish-tan, matrix supported, fine volcaniclastic pebbles
125	133 - west side of fault	4A	Coarse sands and well rounded, fine to medium pebbles 1 to 6 cm and fewer cobbles up to 20 cm, volcanic litholigies, groundwater stained.
>2 m?	133 - west side of fault	1 east of fault	Poorly sorted, more coarse than southwest of the fault, cobbles to boulders with lesser sands. Upper contact lined with a boulder lag.
	133 - west side of fault	Bottom of section
	133 - west side of fault	southwest side of HWY 70	Lithologies andesite, black aphinitic plagiocalse phenocrytss weathering rinds 3mm rhyloites porphyritic and volcaniclastic, well rounded spherical.
	Base of Sulphur Creek terrace
15-20	139	G	Tabular cross-bedded sands interbedded with tephra and bands of darker minerals, charcoal and burrows(?)
5-15	139	F	Cross-bedded, pumice and sand-sized tephra
20-25	139	E	Gray, re-worked, wavy, sand-sized tephra
8-20	139	D	Tan, cross-bedded, sand in 1 mm to 1.5-cm-thick beds, interbedded with thin beds of tephra and with burrows(?) filled with tephra
3-8	139	C	Cross-bedded, sand-sized tephra
18-20	139	B	Rockland ash, sand and pumice, with soft sediment deformation and burrows(?)	tephra bed MV-139B correlates to the Rockland ash 589 ±13 ka
20+	139	A	Upper 3 cm is charcoal-rich silty clay, overlies ~ 5 cm of interbedded tephra, fine sand and silty clay in 2 mm- to 1 cm-thick-wavy beds, overlying massive, gray, fine sand with silt and random coarse sand grains that are subanguar to rounded. Overlying contact abrupt.
	Portola Road Section
No Data	91	F	Moderately well sorted, well to sub-rounded, spherical, pebbles 2 to 4 cm and medium to coarse sand.	faulted against Rockland ash bed
No Data	91	E	N.D.	Overlying deposits not well described.
35	91	D	Reworked Rockland ash in 0.5- to 1-cm-thick parallel beds, oxidized tan color.	minimum depth. Top not found.
65	91	C	Rockland ash, platy, 1-cm-thick charcoal layer at base.	tephra bed MV-91C correlates to the Rockland ash
20	91	B	Well-sorted, moderately cemented, medium to coarse sand, gradual contact with underlying unit	Contact below rockland is N85W 9°S, but from a distance tephra looks like it dips ~ 4°S.
100+	91	A	Well-sorted, dark (organic-rich?), fine to medium sand
	90	J	Well to moderately well-sorted, pebbles range from 2-7 cm and coarse sand, mostly 2-4 cm. Inset to Unit I.
	90	I	Well to moderately well-sorted, pebbles range from 2-7 cm and coarse sand, mostly 2-4 cm. There is re-worked tephra within them. Cuts and is inset into Units E-H.	soil horizons for this site only below:
2	90	H	The surface is disturbed with some gravels on the surface to 3 cm. This looks like an eolian horizon, just sandy, but strange because of setting and the disturbed suface.	A?
9	90	H	Silt and OM skins are 3fpf	A
11	90	H	Silt and OM skins are 3fpf	A2 or B
38	90	H	Well to moderately well-sorted, pebbles range from 2-7 cm and coarse sand, mostly 2-4 cm. There is re-worked tephra within them.	2Bt1
11	90	G	Well-sorted, well rounded, spherical, fine pebbles up to 3 cm, coated with clay films.	2Bt2
9	90	G	Well-sorted, well rounded, fine pebbles up to 2 cm, and well rounded mica-rich, medium to coarse sands, re-worded tephra within.	3Bt1
13	90	G	Well-sorted, well rounded, mica-rich, medium to coarse sands with few 0.5 cm rhyolitic fine pebbles.	4Bt
24	90	G	Well-sorted, silt and clay with few well-rounded quartz sand grains and small rip ups of tephra.	5Bt
26	90	F	Gray and tan Rockland ash bed, platy-parallel-bedded at base is a 2-cm-thick organic-rich layer, unclear if it is depositional or roots and such at stratigraphic change.	6Bt1 - Rockland ash
59	90	E	Rockland ash bed. 2-cm-thick layer of plant material and charcoal at base, platy, parallel-bedded up to 1-cm-thick beds, upper 10 cm are oxidized and mixed with sediment, less pure.	6Bt2, 6B 6C? - tephra bed MV-90E correlates to the Rockland ash, tephra dips 4 degrees north
25	90	D	Well sorted, moderately well-cemented, fine and medium sand with lesser coarse sand, gradual lower contact..	7C
40	90	C	Well sorted, well to sub-rounded, cemented, coarse sand and rare, well-rounded, fine pebbles up to 3 cm.	8C
30	90	B	Dark brown, platy, well sorted, moderately well rounded, organic-rich (?) medium and fine sand
150	90	A	Dark brown, well-sorted, moderately well-rounded, loose fine sand, silt, and lesser clay interbedded with medium sand and silt and coarse sand, oxidized.
	Blairsden Section
No Data	174	J	Massive sand, the top 3 to 6 cm is indurated
No Data	174	I	A larger channel cuts into the underlying silts and is sand-filled with moderately sorted, fine to medium sands and pebbles 1 to 2 cm. Some beds are poorly sorted with pebbles floating within a sandy matrix.
No Data	174	H	Well sorted, interbedded fine and medium sands in 2 to 5 cm wavy beds and alternating colors from dark gray, light gray, to tan.
No Data	174	G	Well sorted, fine sands and silts interbedded with coarse, medium sands with little channels.
	174	covered
~30+	174	F	Well-sorted fine to medium sands
15	174	E	Parallel-bedded, well-sorted fine to medium sand in 1 mm to 0.5 cm beds composed of tephra and sand. Plane beds (?), faint ripples, both symmetrical and assymetrical with < 0.5cm wavelengths.
15	174	D	Massive tephra with round lenses of carser material (sand sized pumice?)	MV-174D correlates to the Rockland ash 589 ±13 ka
15	174	C	The base is composed of 0.5 cm laminations of tephra-rich silts and clays with discontinuous lenses of coarse sand sized pumice with very small channels cut into it. Grades upwards to well sorted, angular to subrounded, fine to medium sand sized tephra with glass, mafic minerals in 11 to 2-cm-thick beds disrupted by dewatering features. (15 cm)	MV-174C correlates to the Rockland ash 589 ±13 ka
22-28	174	B	Massive, silty clay, olive.
75	174	A	Moderately to well-sorted, angular to sub-angular, locally cemented, mica and quartz-rich, medium to coarse sands, in 1 to 8-cm-thick beds, (mostly 1 cm), fining upwards with the top 40 cm fine sands and silts with small channels and small offsets along fractures. (75+ cm)
50	175	F	Well-sorted, massive, fine to medium sand with thick clay films in the fractures
50	175	E	Well-sorted, fine to medium sand, fractured, tan to yellow color
10-20	175	D	Massive, probably reworked tephra, yellow sand and silt	Rockland ash 589 ±13 ka
45	175	C	Tephra, basal 5 cm is the clean, massive silt and fine sand-sized tephra (sampled). 0.5 cm beds of sand-sized tephra gradies upward into a yellow, massive sand.	tephra bed MV-175C correlates to the Rockland ash 589 ±13 ka
40	175	B	Fine sands and silts with lenses of medium to coarse sands, indurated, upper A or B of site 174? The upper 3 to 6 cm is a moderately sorted sand within a channel cut unto unit B.
150	175	A	Well-sorted, sub-angular to well-rounded, medium to coarse sands, loose, mica-rich, in 0.5 to 1-cm-thick wavy beds, gray and tan, similar to site 174, bed A.
50	179	C	Tephra is massive and faulted on the NW and SE sides	tephra bed MV-179 C correlates to the Rockland ash 589 ±13 ka
6	179	B	Massive sandy clay loam, mostly fine to medium sands with lesser well rounded coarse sands
50+	179	A	Well sorted, interbedded fine and medium sands in 2 to 5 cm wavy beds and alternating colors from dark gray, light gray, to tan. Looser, mica-rich sand
80+	178	C	Interbedded silty clay, white either tephra or diatom bed, and black silty clay that may be organic-rich beds that are 1mm to 1-cm-thick beds, few organic-rich beds up to 5 cm. The majority of this unit is composed of white diatom or tephra-rich beds. The white beds are sometimes in continuous beds and sometimes they are aligned blobs. This upper Unit C is more sandy than Unit A and this unit may…
5	178	B	Sparkly, gray sand-sized tephra.	tephra bed MV-178B correlates to the Thermal Canyon ash 740 ka
50+	178	A	Tightly packed, well-sorted, silty clay interbedded with organic-rich beds and white either tephra or diatomite beds in 1 mm to 0.5-cm-thick parallel beds that are in places irregular and may be burrowed. The majority of this unit is composed of tan silty clay.
30	183	T	Massive clay with clay films, 3ppf, along cracks
15-20	183	S	Massive diatoms with clay films, 3ppf, along cracks
45	183	R	Massive clay
25	183	Q	Well sorted, well-rounded, fine to medium indurated sand a lot of clay throughout.
20	183	P	Massive clay
6	182	O	Well-sorted, massive, diatoms
10	182	N	Clayey sand
20	182	M	Sandy clay
4	182	L	Well-sorted, massive, diatoms
40	182	K	Tightly packed, moderately well-sorted, sandy clay, more sandy than below. Upper 10 cm more tightly packed.
30	182	J	Tightly packed,greenish tan, moderately well-sorted, fine sand, silt, and clay, more clay than below.
30	182	I	Tightly packed,greenish tan, moderately well-sorted, fine sand, silt, and clay.
100	182	H	Tightly packed,greenish tan, moderately well-sorted, fine to medium, mica-rich clayey sand
300	182	G	Moderately well to well-sorted, trough cross-bedded, fine to medium sand. Troughs trend ~ N45E to N55E and are about 10- to 16-cm-wide, 1- to 2-cm-high composed of 1-cm-thick bedsets of 1- to 3-mm-thick beds appear to be building to the west. Other views show they are tangential cross sets 2 to 5-cm-thick composed of 1 mm to 1-cm-thick beds.
100+	181	G	Loose, well sorted, fine to medium, trough cross-bedded sands, in 2 mm to 2-cm-thick beds. Two troughs trend ~ N55E. To the west, troughs are 33-cm-wide and 6-cm-high composed of 2-cm-thick bedsets of 1- to 2-mm beds of well-sorted, fine to medium sand.
75	181	F	Fine to medium, tightly packed sands in 1- to 4-cm-thick parallel beds. This unit is faulted and fractured. Many fractures don’t have offset but the base of the unit is offset by ~ 16 cm
30	181	E	Interbedded reddish-brown clay and diatoms. The diatoms become dominant upsection.
48	181	D	Well sorted, tan to yellow to reddish-brown, fine sand and silt, that is platy to thinly bedded, 1 mm to 1-cm-thick beds interbedded with at least two tephras that are ~ 3 to 4-cm-thick and some dark brown, organic-rich(?) sandy clays. There are irregular wavy, lenticular, and discontinuous beds. The lower tephra is gray, 3-cm-thick and 4-cm-above the basal contact. The age and origin of this tep…	tephra beds MV-181-D upper, middle, and lower. MV-181-D lower correlates to MV-192-3C. Older than the Rockland ash
25	181	C	Massive, groundwater-stained, fine sandy clay that is oxidized with a faint pink color and thick clay films coating cracks. This could be 25 cm of weak subaerial weathering into deposits B and C
35	181	B	Greenish-tan that weathers green, massive, groundwater-stained, fine sandy clay.
80+	181	A	Light tan to light olive brown, well-sorted, mica-rich fine to medium, groundwater-stained sand in 1 to 4-cm-thick beds with lesser thin beds of clay and black (organic-rich?) silty clay. The bedding is irregular and rippled and may be burrowed. This unit fines upward.
20	151	O	Moderately well-sorted, sub-angular, medium to coarse sand in irregular, lenticular, discontinuous, 0.5 to 1-cm-thick.
15	151	N	Well-sorted, well rounded to sub-angular, coarse sand and fine pebbles in 0.5 to 1-cm-thick beds.
5	151	M	Indurated, massive, fine sand and silt
25	151	L	Well-sorted, well rounded to sub-angular, coarse sand and fine pebbles in 0.5 to 1-cm-thick beds, shallow channel cut into Unit K.
5	151	K	Indurated, massive, fine sand and silt
15	151	J	Well-sorted, well rounded to sub-angular, coarse sand and fine pebbles in 0.5 to 1-cm-thick beds. Clay films along cracks through deposit and accumulated at base of unit.	possible weak buried soil developed into this.
40	151	I	Well-sorted, sub-angular to sub-rounded, fine to medium sands in 0.5 to 1-cm-thick, planar to gently wavy, tightly packed beds.
125	151	H	Well-sorted, tightly packed, massive, silty clay. Weak soil with clay films (2dpf, 1ppf) along the coarse, cpr structure. Light brown to tan on the top of unit becoming brown with the clay films near the base.	buried soil. diatoms sampled
50	151	G	Moderately sorted, well rounded to sub-angular, quartz-rich, coarse sand to few well-rounded fine pebbles up to 0.5 cm. Cemented by clay with clay films as base of 3ppf on vc sbk.	part of buried soil?
160	151	F	Massive, grayish-brown to brown silty clay.
80	151	E	Gradual change to underlying massive, tan, sandy clay with clay films, 2ppf.	clay films
50	151	D	Gradual change to sandy clay with more sand and thin clay films that could just be pressure films. Unit is interbedded with loose, micaceous sands in 0.5 to 2-cm-thick beds.
200	151	C	Gradual change with beds of sand becoming more common, sands are well-sorted, fine to medium, micaceous, loose sand becoming well-sorted medium to coarse sand 100 cm from the top of Unit C. Beds may be dipping southward and are wavy to irregular with ~ 15-cm-deep troughs within 26-cm-width. Hints of tangential cross sets and rare either burrows of soft sediment deformation	gradual change to the loose sands here, unlike to the west where there is a clear unconformity
120	151	B	Muddy sand with trough cross beds 3-cm-wide and 0.5-cm-wide and 5-cm-wide and 1-cm-wide, bedsets 3 to 5-cm-thick with beds 2 to 5-mm-thick, rare rip-ups of silty clay and pieces of organic matter, wavy bedding near the base.
54	151	A	Tangential tabular cross bedded coarse sand in 11-cm-thick bedsets of 2 to 10-mm-thick beds
20+	192 above stratigraphic section #3	O	Greenish-tan, well-sorted, platy, moderately packed fine sand with thick clay films	Paleosol
20	192 stratigraphic section #3 (192-3)	N	Tan, well-sorted, platy, sandy clay and silt with thick clay films	Paleosol
15	192-3	M2	Tan, well-sorted, tightly packed, clay with disseminated diatoms and thick clay films on the ped faces and dessication cracks	Paleosol
200	192-3	M1	Interbedded fine sand, silt and fine to medium and lesser medium to coarse sand
7	192-3	L	Well-sorted, massive, diatoms	Diatoms
3	192-3	K	Reddish-brown, well-sorted, sandy clay, moderately loose
20	192-3	J	Tan, well-sorted, tightly packed, fine sandy clay.
5	192-3	I	Well-sorted, massive, black clay (organic rich?)
15-20	192-3	H	Well-sorted, interbedded black clay (organic rich?) and dark brown clay in 1 mm to 2-cm-thick beds. Disseminated diatom or tephra througout	Diatoms
5-8	192-3	G	Well-sorted diatoms.	Diatoms
10-15	192-3	F	Well-sorted, reddish-brown, platy fine sand and maybe tephra in 1-mm-thick beds with irregular pockets of fine sand in 0.5- to 1-cm-thick beds. May have some organich rich material in it.
5-10	192-3	E	Well-sorted, laminated tephra or diatoms and fine sand
5	192-3	D	Well-sorted, diatoms and re-worked tephra, looser, platy, with a pink tone	Diatoms
2-8	192-3	C	Well-sorted, white, massive tephra in a 2- to 8-cm-thick bed	Tephra bed MV-192-3C correlates to MV-181-D lower. Older than thte Rockland ash. May be older than Thermal Canyon ash.
10	192-3	B	Well-sorted, laminated fine silt and sand	Diatoms
65	192-3	A	Greenish-tan, well-sorted, massive silty clay. Top is more brown and may be slight oxidation of a weak paleosol.	possible weak paleosol
80	192 strat #2	K	Moderately sorted, sub-rounded to sub-angular, medium to fine sand in 1- to 5-cm-thick beds of ripples with 3-cm-amplitudes.
15	192-stratigraphic column #2 (192-2)	J	Off-white to tan, well sorted, fine sand and silt. Diatoms?
10	192-2	I	Moderately sorted, round to subrounded, micaceous, fine sand in vague 1-cm-thick beds with pockets of medium sand and a rippled or wavy basal and upper contact or possible small offsets along fractures. Might be a channel?
10	192-2	H	Tan, indurated, faintly parallel bedded fine sand and silt in 1 to 3-mm-thick beds.
15	192-2	G	Tan, moderately well-sorted, subrounded to subangualr medium to coarse sand with discontinuous pockets (channels?) of fine pebbles to medium sand
10-15	192-2	F	Off-white to tan, massive, sand and silt. Basal contact is wavy, rippled? Diatomaceous.	diatoms
6-10	192-2	E	Tan, moderately well-sorted, well rounded, loose, massive, sand and silt.
40	192-2	D	Off-white to light tan, well-sorted, indurated, tephra, top 10 cm are bedded fine sands, middle 20 cm are massive fine sands, basal 10 cm are wavy, laminated, fine sand. Basal contact is wavy, rippled?	tephra bed MV-192-2D does to correlate to any known tephra
16	192-2	C	Tan, moderately well-sorted, less indurated, fine to medium sand in 2- to 5-cm-thick beds that dip south.
53	192-2	B	Tan, well-sorted, indurated, interbedded fine sand in 6- to 10-cm-thick beds with dark (organic-rich?) sandy clay in 7-cm-thick bed, the upper sandy bed is 23-cm-thick with organics scattered thoughout.	diatoms
14	192-2	A	Tan to brown, moderately well-sorted, rippled, micaceous, fine sand and silt in 0.5- to 2-cm-thick beds with burrows?.
30	192 stratigraphic column #1 (192-1)	C	off-white to tan, indurated, massive sandy clay with thick (1 to 3 mm) clay films (3ppf) throughout the section along cracks or ped faces	soil
40	192-1	B	Off-white diatoms in indurated sandy clay with thick (1 to 3 mm) clay films (3ppf) throughout the section along cracks or ped faces	soil
150	192-1	A	Gray to tan, massive, clay to silty clay and fine sand with clay in 5 to 30-cm-thick bed with thick (1 to 3 mm) clay films (3ppf) throughout the section along cracks or ped faces. Bed thins to the west	soil - section looks sheared or mixed up through vertic processes with the high clay content
10	10A	E	sand
10	10A	D	well sorted, moderately packed, sand-sized tephra laminated to bedded.	Tephra, not analyzed, reworked Unit B?
10	10A	C	Well sorted,weakly cemented to loose, tabular cross bedded sands in 2- to 5-cm-thick bedsets of 1mm- to 2-mm-thick laminae of interbedded fine to medium with medium to coarse sand. Flow direction is roughly to the NW.
25	10A	B	Well sorted, moderately packed, fine sand-sized tephra in 2- to 5-cm-thick bedsets of 1- to 2-mm-thick laminae. Wavy, abrupt, basal contact. The upper part has trough cross bedded tephra showing flow rounghly W or E. Small symmetric ripples have wavelengths of 50 to 75 mm.	Tephra bed MV-10A-B correlated to MV-10B-E and both possibly correlated with MV-66-C13, or a tephra bed older than Lava Creek B ash
50	10A	A	Well-sorted, sub-rounded, weakly cemented to loose, coarse to fine sand interbedded with fine to medium sand in tabular and trough cross beds 2- to 5-cm-thick, lesser laminated, assymetric ripples of well-sorted, fine sand interlaminated with coarse sand that point to the east. Some beds pinch and swell and the base of this unit is irregular.
42+	10B	G	Moderately sorted, rounded to sub-angular, indurated, faintly laminated in 1- to 2-mm-laminae.
2?	10B	F	Well sorted, laminated, discontinuous, fine sand and silt with an abrupt, wavy lower contact.
1-8	10B	E	Moderately well sorted, sand and sized-sized tephra 1- to 2-mm-thick laminae with blobs within the unit. The mixture of sand and tephra suggests re-working. Basal wavy distinct contact. Sedimentary structures at base show tephra in assyetrical rippled sand.	Tephra bed MV-10B-E correlated to MV-10A-B and both possibly correlated with MV-66-C13, or older than Lava Creek B ash
17	10B	D	Moderately-well to well-sorted, rounded to sub-angular, faintly laminated fine sand and silt in 1- to 2-mm-thick laminae. Krotovinas of overlying tephra within.	~ 2-m-below ground surface, krotovinas modern?
8	10B	C	Loose, clean, well-sorted, well-rounded to sub-rounded, quartz-rich, massive, sand with a wavy, abrupt lower contact.
40	10B	B	Well-sorted, rounded to sub-angular, silt and fine sand with - to 5-cm-thick beds. Some beds are wavy and show what may be assymetric ripples, commonly planar bedding with a gradational contact with Unit A.
50	10B	A	Moderately well to well-sorted, subangular to rounded, weakly cemented to loose, tabular and trough cross bedded coarse to medium sand. Tabular cross beds are 3 cm and 8- to 10-cm-high composed of 0.5- to 1-cm-thick beds and trough cross beds are composed of 0.25-to 1-cm thick beds and are ~ 3- to 10-cm wide and 2- to 3-cm thick that are building to the west and suggest flow generally into and ou…
	Johnsville Road
100-300	89	J	Upper unit is from 1 to 3-m-thick and composed of groundwater stained pebbles and sand associated with terrace remnant at surface. Sub to well-rounded, moderately well-sorted, fine to medium pebbles and coarse sands, pebbles are 1 to 2 cm and cut out underlying sand and pebble beds.	Qdr
~50	89	I	Well rounded, well sorted sand, bedsets are 2-10-cm-thick, beds from 1 to 3-mm-thick.
~50-75	89	H	Well sorted, fine sands, 5 to 14-cm-thick bedsets of 2-5-cm-thick beds that pinch and swell
~50-75	89	G	Interbedded well sorted medium and coarse sands in 3-15-cm-thick bedsets and 1 to 2-cm-thick beds with well-sorted, silty and sandy clay in 1-15-cm-thick bedsets, 0.5 to 1-cm-thick beds to massive, maybe burrowed in places, irregular and non-parallel, wavy bases. The top of sand beds are wavy and overlain by draped silty clay, some loading features within the sand beds.
~1	89	G	The tephra is 1-cm-thick and discontinuous. It was deposited in medium to coarse sands and is several cms below a contact with overlying unit.
~35-45	89	F	bedded sand
~45	89	E	bedded sand
~40	89	D	silty clay
~50-100	89	C	This unit grades laterally to the south becoming more coarse with fine pebbles in 2 to 5-cm-thick beds interbedded with medium to coarse sand beds.
~50	89	B	bedded sand
~50	89	A	silty clay
No Data	88		Interbedded sand and gravel. Pebbles are 1 to 2 cm, maximum 4 cm, well rounded (more rounded than site 85), more sand than found in sites 85- 87, sands and silt bedsets are ~1 to 1.5-m-thick, coarse sand beds are well sorted, stratified 1 to 2-cm-thick beds, horizontal, parallel beds.
~100-150	87	J	Horizontal-bedded, loose sands and pebbles in 5- to 10-cm-thick beds associated with terrace
~75	87	I	Moderately to well-sorted sand and silt
~125	87	H	Moderately sorted pebbles and sand interbedded with finer-grained deposits, mostly moderately to well-sorted sand and silt
~60	87	G	10 to 15-cm bedsets composed of well-sorted, fine to medium sand
~85	87	F	Moderately sorted pebbles and sand interbedded with finer-grained deposits, mostly moderately to well-sorted sand and silt
~30-50	87	E	Reduced, organic-rich (?), silty clay and 5- to 10-cm-thick diatom-rich, discontinuous and burrowed (?) bed
~25	87	D	Well sorted, bedded sand
~25	87	C	Interbedded fine pebbles and sand
~50	87	B	Silty clay
~20	87	A	Interbedded fine pebbles and sand
~100	86	G	0.5 to 1.5-m-thick bedsets of sub to well-rounded, moderately well-sorted, well-stratified, fine to medium pebbles in 2-5-cm-thick beds interbedded with plane bed, trough cross-bedded, tabular cross-bedded, and pinch and swell wave-rippled, non-parallel, well rounded, well sorted, thinly bedded (≤ 1-cm-thick) fine to coarse sands, in ≤ 10-cm-bedsets, mostly fining upwards. Fine sands look white. …
~80	86	F
~120	86	E
~60	86	D
~75	86	C
~50-60	86	B
~100	86	A
~140	85	D	Sub to well-rounded, moderately-well sorted, fine sands and pebbles, 1 to 4 cm, no clear bedding, eroded underlying units and apparently is related to the eroded surface.	Qdr
~160	85	C	Well sorted fine sands and silts, rare coarse sands to fine pebbles within the finer matrix, groundwater stained, no clear bedding, light yellowish-tan, clay films 2dpopf, from the modern soil or buried?
~175-450	85	B	Subrounded pebbles to cobbles, mostly 1 to 3 cm, up to 10 cm, and fine sand, vague bedding, light brown color,
~50-400	85	A	Sub to well-rounded, well sorted, moderately stratified fine pebbles to cobbles, mostly 1-5 cm and up to 15 cm, bedsets from 5 to 50 cm interbedded with fine to medium sand in 1.5 to 2-cm-thick beds, scattered coarse sands to fine pebbles throughout, oxidized.
>10000	2	general desciption	Well-sorted, stratified, imbricated, cobbles, pebbles and a lot of sand, and lesser silts.
	Gray Eagle Creek - southeast, along the creek
~125-250	67	H	The uppermost unit H is better sorted and finer grained than Unit G. It is moderately sorted, moderately well-stratified, sub-angular to well-rounded, coarse sands to fine boulders. There is a soil developed into this unit that has a 50 to 75 cm zone of oxidation.
100-300	67	G	Varies in thickness from 1 to 3 m. It is composed of moderately to poorly sorted, poorly stratified, sub-angular to rounded, 0.5 to 2 m boulders, cobbles, and pebbles and coarse sand, parts are clast supported and parts are matrix supported in a coarse sand matrix. Subtle imbrication in some strata, looks like a transitional unit from till to outwtephra.
~50-100	67	F	Moderately sorted coarse sands and lesser fine to medium sub angular to well-rounded pebbles that cut out the underlying units in the downstream part of this exposure. This is the lowest part of the outwtephra and till.
~25-150	67	E	Indurated, tan, well-sorted, medium to coarse, sand in deltaic foresets?
~300	67	D	Groundwater-stained moderately-well sorted coarse sands interbedded with moderately well-sorted, sub-angular to well-rounded, fine to medium pebbles, in 5 to 10 cm beds.
700+	67	C	~ 7-m-thick section of ~ 1 m-thick beds that are reduced from the high clay content and are blue, purple, gray, and grayish-tan. Fine sandy clay loam in ~ 5 to 10 cm bedsets of 1 mm to 1 cm beds, with convoluted bedding structures including flame and dish and pillar structures. In places there are parallel ripples (climbing vertically?) and few bed beds. The bed beds are laminated in 1mm to 1 cm-…
150-200	67	B	~ 1.5 to 2 m of 1 to 5-cm-thick bedsets of 1 to 2 mm laminae of well-sorted, mica-rich, fine sands, silts, and lesser clays and organic matter and rare clasts up to 2 cm in ripples, discontinuous, lenticular beds, with cross-sets of fine sands with 10-cm-wavelengths and 0.5-cm-amplitude (Ripple index of 10-20, indicating either wave or current origin). Foreset laminae 5 to 8-cm-long appears to sh…
~100+	67	A	Organic-rich - well-sorted, fine sands and silts, interbedded and interlaminated with organics.
~200+	66.5	N.D.	It is composed of well- to sub-rounded, moderately well-sorted, spherical, imbricated and clast supported coarse pebbles and cobbles.
~200+	66.5	N.D.	These gravels are from 2 to 10 cm, mostly 3 to 5 cm, in 10- to 15-cm-thick beds, groundwater-stained with few, well-sorted, coarse sand interbeds <5-cm-thick
~550	66	D	Moderately sorted, moderately well-stratified, sub-angular to well-rounded, coarse sands to fine boulders. There is a soil developed into this unit that has a 50 to 75 cm zone of oxidation.
6	66	C20	Well-sorted, fine sand. ( 6cm)
65	66	C19	Blocky, massive silty clay with some fine sand. (65 cm)
1-2	66	C18	Top of channel, tephra. (1 to 2-cm-thick)	tephra bed MV-66-C18 correlates to MV-70-B and to MC-GG-6 ca. 200 ka
35-45	66	C17	Part of channel, dark, organic-rich, silty clay interbedded with tephra in 0.5 to 4-cm-thick bedsets. (35 to 45 cm).
17	66	C16	Channel fill - interbedded, dark, organic-rich clay and diatoms. Base is 5 cm of organic rich clay, 2 cm of diatom and/or tephra, 2 cm of organic-rich clay, 6 cm of massive brown clay, 2 cm of organic rich clay. wavy upper contact, (17 cm).
20	66	C15	Ripple-laminated, organic-rich silty clay. (20 cm)
15	66	C14	Brown-black, organic-rich, fisssile, laminated bed. (15 cm)
5-8	66	C13	Well-sorted indurated, sand-sized tephra (5 to 8-cm-thick)	teprha bed MV-66-13 correlates to MV-45.5D and MC-GG-2 ca. 200 ka
14	66	C12	Brown-black, fisssile, laminated, organic-rich bed. (14 cm)
1-3	66	C11	Well-sorted fine, sand-sized tephra. (1 to 3-cm-thick)	tephra bed MV-66-C11 correlates to MV-45.5D and MC-GG-1 ca. 200 ka
16	66	C10	Brown-black, organic-rich, fisssile, laminated bed. (16 cm)
8	66	C9	Ripple laminated fine sands and silts. (8 cm)
3	66	C8	Laminated organic-rich, fine sands and silts. (3 cm)
8	66	C7	Well-sorted, fine sands interbedded with lesser organic matter in 1-mm-thick laminae in 3 to 10-mm-thick bedsets. (8 cm)
5	66	C6	Fissile, organic matter inter-laminated with well-sorted fine sand. (5 cm)
8	66	C5	Well-sorted fine sands and silts. Basal 3 cm are ripple laminated, upper 5 cm are massive. Becoming less organic-rich up-section. (8 cm)
4	66	C4	Sandy clay interbedded with tightly packed, well-sorted, sand in 2 to 5-mm-thick bedsets of laminations < 1 mm. (4 cm)
9	66	C3	Brown-black, organic-rich, beds interbedded with tightly packed fine sand, silt, and clay in 2 to 10-mm-thick bedsets of 1 to 2 mm laminations and lenticular beds. (9 cm)
15	66	C2	Brown bed interbedded with tightly-packed, fine sand in non-parallel, wavy, laminations. (15 cm)
35	66	C1	Brown-black, organic-rich, fisssile, laminated bed. (35 cm)
~75-100	66	B	Well sorted, fine to medium sands in 1 to 3-cm-thick beds, interbedded with discontinuous, lenticular sandy clay, discontinuous, symmetrical wave ripples, and tabular cross-beds pointing upstream
~250+	66	A2	Poorly-sorted, sub-angular to sub-rounded, fine to medium pebbles in a sandy silt matrix.
~150+	66	A1	Well to sub-rounded, moderately well-sorted, spherical coarse pebbles and cobbles, 2 to 10 cm, mostly 3 to 5 cm, in 10 to 15-cm-thick beds, imbricated, clast supported, groundwater-stained with few, well-sorted, coarse sand interbeds <5-cm-thick. mostly silicic lithologies, lesser rhyolite.
	284/65
~100	284/65	W	Moderately well-sorted, sub to well-rounded, matrix supported boulders and cobbles in sand. There is a soil developed into this unit that has a 50 to 75 cm zone of oxidation.
~50	284/65	V	Massive, diatom-rich silt and sand, white tephra and diatoms. Up to 1-m-thick.	tephra bed MV-284-V may correlate to Buck Lake 3988 > 443-437 ka
~100	65	U	Interbedded, horizontally bedded, well-sorted, sands with silty sand in 2 to 10-cm-thick beds
~150	65	T	Sub to well-rounded, moderately well to well-sorted, trough cross-bedded sands in 2 to 6-cm-thick bedsets of 1 to 3 mm-thick beds. Mica-rich, goundwater-stained with abrupt and wavy basal contact.
~35	65	S	Massive silt and sand.
~75	65	R	Well-sorted, trough cross-bedded fine to coarse sands in 1 to 5-cm-thick beds. Coarse sands in thicker beds, fine to medium sands in finer beds.
~50	65	Q	Well-sorted fine to medium sands in 1 to 2-cm-thick beds that pinch and swell. Weathers white but is not a tephra.
~50	65	P	Organic-rich in 0.5 to 1-mm-thick beds, gray-black color.
~75	65	O	Well-sorted fine sands in vague 1 to 2-mm-thick laminae in 2 to 3-cm-thick bedsets, grayish tan. Gradational basal contact.
~100	65	N	Indurated, massive, gray sandy clay.
~25	65	M	Moderately sorted, fine to coarse sand in 0.5 to 1-cm-thick beds, loose, tan.
~75	65	L	Well-sorted fine to medium sands in 2 to 5-cm-thick wavy beds with rare coarse sand beds. Indurated and alternating tan and gray.
~50	65	K	Massive, indurated, blocky, fine and lesser medium sand and sandy clay, gray. Small offsets with change of facies across fractures, varies laterally, can be laminated, brown clay, or gray, hard, sandy clay.
~40	65	J	Platy, organic-rich, feels like leaf litter, gray-black color.
~100	65	I	Massive, tightly-packed silty clay loam with scattered clasts 2 mm to 1 cm, sub-angular to rounded, and some fine sand and silt. Brown near the base, upwards becoming gray, with the upper 25 cm dark brown.
~75	65	H	Well-sorted, sub-angular to rounded, medium to coarse sands at base, fining upwards to fine with lesser medium sand, in 1 mm to 0.5-cm-thick planar beds, greenish-tan color, quartz-rich, indurated.
~100	65	G	Well-sorted, sub to well-rounded, medium to coarse sands, 7 to 10-cm-thick bedsets in 2 mm to 1.5-cm-thick wavy and convoluted beds, light-tan color, has re-worked tephra within.
~150-175	65	F	Well-sorted, well-rounded, medium to coarse sands, up to 0.5 to 1-cm-thick faint, plane beds. Groundwater-stained in yellow. Has re-worked tephra within.	Rockland ash bed
	65	F	White, sand-sized tephra, 1-cm-thick.	Rockland ash bed
	65	F	Well-sorted, gray, sand and sand-sized tephra	Rockland ash bed
	65	F	White, sand-sized tephra, 1-cm-thick	Rockland ash bed
	65	F	Well-sorted, convolute beds, medium sand-sized tephra.	Rockland ash bed
	65	F	Well-sorted sand-sized tephra, bedsets 8 to 12-cm-thick and beds 2 mm to 5-cm-thick becoming more white (more pure?) tephra at the base. Burrowed or rips ups near the base.	Rockland ash bed
~75-100	65	E	Massive, very tightly-packed, silty clay loam with rare, scattered, well-rounded, clasts 2 mm to 1 cm. Sand sized quartz grains. Brown but weathers white has a turquoise color in parts, water seeps from upper contact Fine pebbles ice rated debris(?), dark color may not mean organic-rich here.
~100	65	D	Dark black-brown, organic-rich, massive, tightly-packed sandy clay with chunks of charcoal and scattered coarse, angular to rounded, sand grains, (quartz and other lithologies), weathers white, coarsens upward from a basal sandy clay to an upper silty loam, with a 1 to 2-cm-thick clean sand lens that pinches and swells at the upper contact.
~50-75	65	C	Moderately well-sorted, sub to well-rounded, 2 to 5-cm-thick beds of alternating medium and coarse sand with fine sand and silt, variable thickness (30 to 60 cm) brown and tan, lithologies: quartz, hornblende, mica, etc.
~130+	65	B	Poorly to moderately sorted, sandy clay, coarsening upwards becoming sandier, scattered clasts, sub-angular to rounded, 2 mm to 1 cm of fine-grained volcanics (rhyolite?) and rip-ups of pink, fine-grained material.
~100+	65	A	Moderately well to well-sorted, sub to well-rounded, cobbles and pebbles, and coarse sands, groundwater-stained.
	Table S1 (continued). Stratigraphic Descriptions from sites in Mohawk Valley
	Site(s)	Unit	Description	Notes
~100-130+	64	J	Varies in thickness from 1 to 3 m. It is composed of moderately well-sorted, moderately stratified, sub-angular to rounded, 0.25 to 0.75 m boulders, cobbles, pebbles and coarse sand.
~150	64	I	Moderately well-sorted, sub-angular to rounded, pebbles, 2 to 3 cm interbedded with coarse sands in 5 to 10-cm-thick beds. In places beds are tabular cross beds dipping upstream changing laterally to sub-parallel, planar beds, at the base become moderately sorted, cobbles to 8 cm, pebbles and sand. Groundwater stained and indurated.
~25	64	H	Silty sand.
~75	64	G	Diatoms in planar bedded, moderately sorted, silt and sand. (topsets?)
~50	64	F	Moderately well-sorted, sub-angular to rounded, fine to coarse pebbles interbedded with coarse sands in 7 to 10-cm-thick bedsets of 2 to 6-cm-thick beds. Upper beds are tabular cross beds dipping downstream (foresets?) becoming wavy and sub-parallel below. Groundwater stained and indurated.
~25	64	E	Moderately well-sorted, fine to medium sand in plane beds with few glass shards.
~50	64	D	Moderately-well sorted, sub-angular to rounded, fine to medium pebbles interbedded wtih medium to coarse sands in 5 to 10-cm-thick bedsets and 2 to 6-cm-thick beds, and lenses of diatom-rich silty sand. Tabular cross beds change along exposure dipping upstream and downstream, both sit upon wavy, sub-parallel beds.
~30	64	C	Moderately sorted, sub-rounded to rounded, cobbles to 10 cm, and coarse sands, indurated.
~50	64	B	Well-sorted, medium to coarse sands in 4 to 7 cm bedsets of 1 to 3 cm tabular crossbeds, with assymetrical ripples above.
~40+	64	A	Moderately sorted, sub-rounded to rounded, fine to medium, spherical pebble from 1 to 3 cm in a muddy matrix, indurated.
	Gray Eagle Creek- northwest of the creek
No Data	263		Very coarse boulders >1m to med pebbles. Mostly boulders to cobbles on surface. Intermediate color.
No Data	270		Sub angular to well-rounded cobbles in a muddy matrix. Interbedded matrix supported and clast supported units.
~425+	271		Silt matrix with poorly sorted angular to subrounded pebbles to boulders to 50 cm, intermediate color. Loosely stratified till to outwash transition?
~250/~150+	272		Well-sorted, loose sand mixed with pebbles and cobbles overlying well sorted, bedded sand
~75	274	E	well-rounded pebbly sand
~125	274	D	well-sorted sands and silts with wavy bedding with dewatering features
~100	274	C	well-sorted silts and sands, with tabular cross-beds
~100	274	B	well-rounded pebbles and coarse sands, groundwater stained
~100+	274	A	Reduced, gray silty-sand
No Data	275		Well-sorted, thinly bedded, parallel bedded sands with some wavy bedding and some dewatering structures. Some beds dip downhill either because they are delta foresets from Gray Eagle Creek or faulting has tilted the beds.
~100	277	C	Loose silts and fine sands with no clear soil properties
~250	277	B	Moderately sorted silty sand with scattered coarse sands, weakly cemented with weak paleosol: 2ccpr, cf=3ppf, and weak oxidation
~100+	277	A	well-sorted, medium sands
No Data	281		Sandy clay with thick clay films
~150/~100/~150+	282		Well-sorted medium sands, fine sands, and silty clay with a 1m+ soil developed into it. Films are partially pressure films but there is some oxidation, organic matter, and clay films 3ppf.
No Data	279.5	D	Loose, silty sand with well-rounded pebbles and cobbles on surface.
No Data	279.5	D	Moderately well-sorted, sub to well-rounded, moderately stratified pebbles to fine boulders in a sandy matrix. Moderately indurated.
No Data	279.5	C	Medium to coarse sands cut into underlying silty clay. Soil developed into both deposits. Clay films extend 1 to 2 m into the soil and are 3ppf. Very little other soil development.
No Data	279.5	B	Sillty clay
No Data	279.5	A	Moderately sorted coarse sands to fine pebbles (rare medium pebble) with silts, moderately cemented.
Not Applicable	276	C	Cobbles and boulders on the surface.
~100	276	B	Loose sand and silts, might be the distrurbed layer from logging.
~325+	276	A	moderately sorted silty sand with scattered coarse sands, weakly cemented with weak paleosol: 2ccpr, cf=3ppf, and weak oxidation
	Jamison Creek
~100	70-upstream	W	Well-rounded, well-sorted, cobbles and boulders.
~85-100	70-upstream	V	Well-rounded, well-sorted, fine to medium pebbles 1-5 cm, in 20-75 cm bedsets, 5-10 cm beds, groundwater stained, rip-up clasts up to ~30 cm.
~50	70-upstream	U	Moderately to well-rounded, well-sorted, fine to coarse sands, parallel and cross-bedded, 1-20 cm bedsets, moderately indurated, light tan.
~75-100	70-upstream	T	Well-rounded, well-sorted, fine to medium pebbles 1-5 cm, in 20-75 cm bedsets, 5-10 cm beds, groundwater stained, rip-up clasts up to ~30 cm.
~50	70-upstream	S	Moderately to well-rounded, well-sorted, fine to coarse sands, parallel and cross-bedded, 1-20 cm bedsets, moderately indurated, light tan.
~20	70-upstream	R	Well-rounded, well-sorted, fine to medium pebbles 1-5 cm, in 20-75 cm bedsets, 5-10 cm beds, groundwater stained, rip-up clasts up to ~30 cm.
~20	70-upstream	Q	Moderately to well-rounded, well-sorted, fine to coarse sands, parallel and cross-bedded, 1-20 cm bedsets, moderately indurated, light tan.
~20	70-upstream	P	Well-rounded, well-sorted, fine to medium pebbles 1-5 cm, in 20-75 cm bedsets, 5-10 cm beds, groundwater stained, rip-up clasts up to ~30 cm.
~15-25	70-upstream	O	Moderately to well-rounded, well-sorted, fine to coarse sands, parallel and cross-bedded, 1-20 cm bedsets, moderately indurated, light tan.
~50-75	70-upstream	N	Well-rounded, well-sorted, fine to medium pebbles 1-5 cm, in 20-75 cm bedsets, 5-10 cm beds, groundwater stained.
	Table S1 (continued). Stratigraphic Descriptions from sites in Mohawk Valley
	Site(s)	Unit	Description	Notes
~25	70-upstream	M	Moderately to well-rounded, well-sorted, medium to coarse sands, 10-30 cm bedsets, moderately indurated, light tan.
~25	70-upstream	L	Well-rounded, well-sorted, fine to medium pebbles 1-5 cm, in 20-75 cm bedsets, 5-10 cm beds, groundwater stained, rip-up clasts of sands, diatoms, and tephra up to ~30 cm.
~25	70-upstream	K	Well-sorted, stratified sands, bedsets 10 to 3 m, beds 2 to 5 cm, forsets dip downstream, pinch and swell. Underlying contact is abrupt with a regular, symmetrical, wavy shape resulting in a pinch and swell of total bed thickness.
~20-100	70-upstream	J	Well-sorted, fine to medium sands, laminated to 1 cm beds, light tan, diatom-rich. This is the location of the “upper left” sample and is in a channel fill cut into underlying organic-rich muds that contain the“upper” sample.
~15-100	70-upstream	I	Organic-rich muds that contain the“upper” sample.
~50	70-upstream	H	Rounded, well-sorted, pebbles 1-4 cm and sand.
~20	70-upstream	G	Organic-rich sandy clay.
~15	70-upstream	F	Light brown sand with scattered pebbles.
~10	70-upstream	E	Well sorted, well rounded pebbles and sand.
~20	70-upstream	D	Organic-rich sands and silts with scattered pebbles 1-3 cm.
~30-40	70-upstream	C	Subangular to well-rounded, poorly sorted, pebbles 1-2 cm, within silt and lesser sand matrix, tightly packed, light brown.
~150	70-upstream	B	Sub to well-rounded, poorly sorted, pebbles 1-3 cm, within fine sand and silt matrix, lithologies: granitics, tightly packed, dark grayish brown.
~75+	70-upstream	A	Well-rounded, moderately well-sorted, stratified, medium pebbles to cobbles from 1-6 cm, lithologies: granitics, andesites, quartzite.
~70-85	70-downstream	I	Organic-rich muds that contain the“upper” sample.
~10-20	70-downstream	unit not in the upstream section	Irregular, organic-rich sands.
~25-125	70-downstream	H	Round to well-rounded, moderately well- sorted pebbles 1-4 cm and sand.
~50-100	70-downstream	F	Well-sorted tan sand.
~50	70-downstream	E	Well-sorted, wavy sand with rare glass shards.
~25-100	70-downstream	D	Sub to well-rounded, moderately sorted, pebbles 1-2 cm, within sands, becoming well-sorted pebbles.
~100-150	70-downstream	B	Well sorted, fine sand, silt, and clay, 1 cm beds, filling a channel, rip ups of sand, irregular light colored spots, likely burrows. Very small amount of glass, tightly packed, grayish-brown.	tephra bed MV-70 downstream B correlates to MV-66-C18 and MC-GG-6. ca. 200 ka
~50+	70-downstream	A	Sub angular to well-rounded, moderately sorted, pebbles 1-3 cm, within fine sand and silt matrix, tightly packed, light gray.
~300	48	E	Well-sorted, stratified, imbricated, boulders, cobbles, pebbles and sand.
~50	48	D	Moderately well-sorted coarse sands and fine pebbles, ~50-cm-high foresets dippping downstream overlie sands and gravels with rip ups of lenses of well-sorted sand.
~50	48	C	Moderately well-sorted coarse sands. Buried surface?
~290-300	48	B	Moderately well-sorted coarse sands, pebbles, and cobbles to 10 cm, 1.5 to 2 m foresets dipping downstream and are truncated in places by channels filled with bedded sands.
~200	48	A	Fine to coarse pebbles within muds.
~130	47	L	Sand with beds of white tephra or diatoms.
~50	47	K	Silt and sand, white tephra or diatoms.
~100	47	J	Sand
~70-80	47	I	Sub to well-rounded, moderately well-sorted pebbles and sands.
~40-50	47	H	Silt and sand, white tephra or diatoms.
~175	47	G	Sub to well-rounded, moderately well-sorted, cross-bedded fine pebbles to cobbles in 20-75 cm bedsets and 5-20 cm beds with wavy sands in 5-15 cm bedsets.
~225-300	47	F	Well sorted sands in 5-20 cm bedsets and 0.5-3 cm wavy beds, dipping steeply basinward.
~75-175	47	E	Well sorted medium pebbles to cobbles with large lenses of well-sorted sands within.
~40	47	D	Sands, buried surface/soil?
~140	47	C	Fine to coarse pebbles within muddy matrix.
~300	47	B	Bedded sands with lesser fine to coarse pebble beds.
~175+	47	A	Bedded sands
~100	45	Z	Medium to coarse sands and fine pebbles. No clear bedding.
~50	45	Y	Tightly packed, white, silts and diatoms. No clear bedding, tephra (not preserved enough to analyze)
~50	45	X	Well-sorted fine to medium sand in 1-5 mm beds, diatoms, tephra (not preserved enough to analyze)
~150	45	W	Tightly packed sandy silt, diatoms, white and fluffy at the base, becoming less white toward the top, gradual upper contact, may be bioturbated, no clear bedding.
~50	45	V	Silty sands. No clear bedding.
~15	45	U	Sparkly silt, diatoms, and tephra (not preserved enough to analyze), paleosol?
~15	45	T	fine to medium sands
~15	45	S	Sparkly silt, diatoms, and tephra (not preserved enough to analyze)
~15	45	R	fine to medium sands.
~15	45	Q	Sparkly silt, diatoms, and tephra (not preserved enough to analyze)
~1125	45	P	Change in lithology to more volcanic, rhyolitic lithologies, lesser metasedimentary, and some quartz, matrix has a reduced gray-greenish tint. Gravels are fine to medium pebbles interbedded with silts, sands, silty clay, organic-rich beds, diatoms, and carbonate-rich mud. Sub to well-rounded, moderately well to well-sorted interbedded pebbles in 50-100 cm bedsets of 5-15 cm beds with fine to coar…
~150	45	O	Interbedded organic-rich beds with silty clay and well sorted sands, lesser fine pebbles, bedsets 2-5 cm, laminated to thin wavy beds, (flaser?).
~15	45	N	Fine sand and silts, well- sorted, carbonate-rich mud, white to light gray.
~50-75	45	M	Subangular to sub-rounded, poorly sorted fine pebbles in a green mud, lithologies: mostly rhyolitic volcanic with lesser metasedimentary.
~50	45	L	Subangular to well-rounded, moderately well to well-sorted fine pebbles interbedded with coarse sands, 10 -30 cm bedsets of 5-20 cm beds, lithologies: mostly rhyolitic volcanic with lesser metasedimentary rocks.
~60-70	45	K	Subangular to well-rounded, moderately well to well-sorted pebbles to cobbles up to 10 cm interbedded with coarse sands, 20 -75 cm bedsets of 5-30 cm beds, lithologies: metasedimentary, igneous (felsic), volcanic, and volcaniclastic, tan, loose.
~220	45	J	Subangular to well-rounded, moderately well to well-sorted pebbles to cobbles up to 10 cm interbedded with coarse sands, 20 -75 cm bedsets of 5-30 cm beds, lithologies: metasedimentary, igneous (felsic), volcanic, and volcaniclastic, tan, loose.
~125	45	I	Change in character, coarser above. Subangular to well-rounded, moderately well to well-sorted pebbles to cobbles up to 10 cm interbedded with coarse sands, 20 -75 cm bedsets of 5-30 cm beds, lithologies: metasedimentary, igneous (felsic), volcanic, and volcaniclastic, groundwater stained, loose, channeled erosive contact with underlying sands.
~50-60	45	H	Well sorted wavy silts and sands, 5-10 cm bedsets of 0.2 -2 cm beds, tightly packed.
~40	45	G	Sub to well-rounded, well-sorted symmetrical and assymetrical wavy sands and lesser silts, 5-10 cm bedsets of 0.2 -2 cm beds, tightly packed.
~125-150	45	F	Subangular to well-rounded, mostly well-rounded to rounded, moderately well to well-sorted pebbles and coarse sands, 10-20 cm bedsets of 5-10 cm beds, lithologies: metasedimentary, igneous (felsic), volcanic, and volcaniclastic, groundwater stained, loose, channeled erosive contact with underlying sands.
~75	45	E	Well-rounded, moderately well to well-sorted, fine to medium sands, 5-10 cm bedsets of 0.5-3 cm interbeds of fine to medium sands with lesser fine pebbles to 3 cm, tangential crossbeds, tan with oxidized areas in coarser sands, very weakly indurated.
~50-75	45	D	Sub to well-rounded, moderately well to well-sorted interbedded pebbles and sands. 5-20 cm bedsets of 2-5 cm beds, flat and spherical fine pebbles to 3 cm, with medium to coarse sands, gray with oxidized areas in coarser sands and tan to gray sands and gravels, very weakly indurated, mostly volcanic / rhyolitic litohologies.
~50-75	45	C	Sub to well-rounded, well-sorted, medium to coarse sand, 10-25 cm bedsets of 2-5 cm wavy beds, with 5-20 cm wavelength, lesser thin wavy beds of silt and fine sand, gray with oxidized areas in coarser sands and tan to gray medium sands, tightly packed.
~50	45	B	Rounded, moderately to poorly sorted, fine to medium pebbles up to 2 cm, in a sandy to silty clay matrix, light brown, tightly packed to indurated, mostly volcanic/rhyolitic lithologies.
~125	45	A	Well to sub-rounded, spherical, moderately well-sorted, fine to medium pebbles in a sandy matrix, orange groundwater-stained, loose.
	Mohawk Cliff (Site MV-315)
125	Mohawk Cliff	OO	Well sorted, stratified, sands
225	Mohawk Cliff	NN	Well sorted, stratified boulders to sands
125	Mohawk Cliff	MM	Well sorted, stratified, sands
200	Mohawk Cliff	LL	Well sorted, stratified boulders to sands
100	Mohawk Cliff	KK	Well sorted, stratified, sands
125	Mohawk Cliff	JJ	Well sorted, stratified boulders to sands
120	Mohawk Cliff	II	Well sorted, stratified, sands
150	Mohawk Cliff	HH	Interbedded, medium gray, dull gray-green, pale gray, greenish- brown, grayish- brown, clayey silt and silty clay, slightly oxidized with manganese stains in places, LOI - 0 to ~10%.	From top of section to base of AA, the depths and descriptions are from 1998 study by J. Yount, M. Reheis, S. Starrat, and M. McGuire, 2008, pers. commun. Below that are descriptions and depths from Rredwine and Adams current study.
525	Mohawk Cliff	GG	Brown to black to gray organic-rich, silty clay and clayey silt, iridescent in part, LOI - 20 to 100%, mostly ~60%.
50	Mohawk Cliff	FF	Grayish-brown, brown, black, green, tan, light brown, greenish-brown, silty clay and clayey silt, some organic-rich beds with LOI up to 20%, few, thin beds with carbonate, one diatomaceous bed.
30	Mohawk Cliff	EE	Organic-rich silty clay.
155	Mohawk Cliff	DD	Grayish-brown, brown, black, green, tan, light brown, greenish-brown, silty clay and clayey silt, some organic-rich beds with LOI up to 20%, few, thin beds with carbonate, one diatomaceous bed.
325	Mohawk Cliff	CC	Upper 250 cm is dark to light brown and black, organic-rich, mostly fissile, silty clay and clayey silt with LOI 20 to 100%, mostly 30-50% few, thin beds with carbonate and silty clay beds up to 20-cm-thick with no organic matter. Lower 75 cm is dark to light brown and black, organic-rich, silty clay and clayey silt with LOI 25 to 80%, gray streaks throughout, few, thin beds with carbonate and du…
75	Mohawk Cliff	BB	Dark to light brown and black, clayey silt with LOI 0 to 10%, mostly 0%, gray streaks throughout, some carbonate beds.
50	Mohawk Cliff	AA	Tan, sandy clay loam, LOI 0 to 10%, mostly 0%.	From top of section to base of AA, the depths and descriptions are from 1998 study by J. Yount, M. Reheis, S. Starrat, and M. McGuire, 2008, pers. commun.
70	Mohawk Cliff	Z	Sand-size tephra and pumice, cross trough beds (5 X 2 cm), irregular beds, and overlying wavy, parallel laminated 1 mm to 1 cm-thick beds, becoming thicker up-section (up to 3 cm-thick), then fining as wavy, parallel, laminated sand to silt sized tephra. Prior study described as white, tan, grayish-tan, laminated silt sized tephra becoming sand-sized and slightly oxidized near the top.	All stratigraphic descriptions from this unit to the base are from the current study. All LOI values are from the prior study (J. Yount, 2008, pers. commun.)
55	Mohawk Cliff	Y	Basal 30 cm (55 cm from Yount et al. ) appears most pure (airfall?), with overlying sandy cross trough beds (5 X 2 cm), irregular beds, and overlying wavy, parallel laminated 1 mm to 1-cm-thick beds, becoming thicker up-section (up to 3 cm-thick) where tephra looks reworked.	tephra beds JY-92-64, RC-74 correlate to the Rockland ash
170	Mohawk Cliff	X	Interbedded, dark brown, platy, organic-rich beds with LOI 20 to 80%, LOI 45% directly below the Rockland ash, with bluish silty clay (~25 to 35% clay, 60% silt, 5 to 15 % sand) with blobs (burrows? soft sediment deformation?) within it.
42	Mohawk Cliff	W	Tan to gray, irregular beds 5 to 10-mm-thick, fine to medium sands with some soft sediment deformation, oxidized, more indurated than below, wavy basal contact.
42	Mohawk Cliff	V	Tan, relatively loose, trough cross-bedded, fine to medium sands in 5 to 7-mm-thick beds with pieces of charcoal within. There are pinches and swells that look like eyes that are 8-cm-wide and 1.5-cm-high, the cross beds look like they are building upwards and upstream.
25	Mohawk Cliff	U	Tan, massive, sandy clay with specks of charcoal and organic matter, the upper part is light colored, laminated, up to 2-cm-thick beds of fine to medium sand.
175	Mohawk Cliff	T	Green-grey, ripple bedded, sandy clay in up to 5 cm-thick beds and with pieces of wood throughout interbedded medium to coarse sands in up to 9 cm-thick beds and fine pebbles up to 1 cm within beds up to 16-cm-thick. Upstream this unit is finer-grained cracks through the unit are lined with clay films, 3ppf, that could be from the modern surface in the location where this was described or could b…
12	Mohawk Cliff	S	Massive, brown, sandy clay with organic matter, light bulk density, sticks to tongue (weathered tephra?).
25	Mohawk Cliff	R	Dark brown, platy organic-rich bed.
235	Mohawk Cliff	Q	Bedsets from 8 to 11-cm-thick composed of 2 to 5-cm-thick beds of dark brown, organic-rich fine sand and wood that weather platy, interbedded with wavy and irregular beds 1 to 5-mm-thick of light brown, diatom or tephra-rich, fine sandy to silty clay, gentle wavy basal contact.
73	Mohawk Cliff	P	Parallel laminated, dark brown fine sandy clay in 1 to 7-mm-thick beds with pieces of organic matter throughout.
33	Mohawk Cliff	O	Massive, brown sandy clay with small, 1 to 2 mm, pieces of organic matter throughout.
25	Mohawk Cliff	N	Unit fills channel cut into underlying Unit M. Channel fill is composed of fine pebbles and coarse sands with rip-up clasts of silty clay that are 2 to 4-cm-thick, beds are 1 to 2-cm-thick. The top is slightly oxidized, paleosol(?).
42	Mohawk Cliff	M	Massive, brown, sandy clay
22-37	Mohawk Cliff	L	Unit is a channel cut into underlying Unit K is filled with tan, coarse sands and fine pebbles, 6 to 10-cm-thick beds interbedded with tan and green fine sands and silts in 2 to 10-mm-thick beds with pockets of organic matter
85	Mohawk Cliff	K	Upper-37 cm - Massive to faintly laminated, greenish-gray, silty clay with scattered 1 to 3 mm pieces of organic matter. Middle-25 cm- Massive, brown-gray-green, silty clay with rare fine pebbles up to 4 mm and clay films lining cracks that are 2dpf and 3dpf. Lower – 23 cm - Massive to faintly laminated, green-gray, silty clay with scattered 1 to 3 mm pieces of organic matter, abrupt, wavy basal …	Previous study found Lava Creek B ash bed in this stratigraphic location. Redwine and Adams did not re-locate this tephra bed.
112	Mohawk Cliff	J	Subangular to subrounded coarse sand in bedsets 10 to 30-cm-thick interbedded with fine pebbles with charcoal and organic matter throughout that coarsen upwards from 3 to 6 mm in bedsets 7 to 19-cm-thick. Two beds of laminated, blue, silty clay are 8 and 1-cm-thick.
20	Mohawk Cliff	I	Unit is a channel cut into underlying Unit H, filled with massive, tan, fine sandy clay with pockets of coarser sand and liesegang banding
25	Mohawk Cliff	H	Ripple-laminated, blue silty clay, interbedded with brown, organic-rich layers. Ripples are 7X2 cm and 10X3 cm and ripple Indices are 3.5 and 3.3, within the assymetrical wave ripple category using the ripple index (Reineck and Wunderlich, 1968).
127	Mohawk Cliff	G'	At the base is a fine-medium purple sand 2 to 4 cm-thick (tephra?). Overlying are irregular, wavy beds 11 X 5 cm, tan, fine sand in 1 to 11-cm-thick beds interbedded with coarse sand in 3 to 6-cm-thick beds, and blue, silty clay in 4 to 25-cm-thick beds. A pink, sandy layer 1 to 2-cm-thick is 36 cm above the base (tephra?). At 100 cm above the base there are interbeds of darker brown, organic-ric…
225	Mohawk Cliff	G	Interbedded, 15 to 25-cm-thick bedsets composed of massive, blue-gray, 0.5 to 2-cm-thick beds of silty clay, massive 2 to 5-cm-thick beds of silty clay, and interbedded, tan and blue-gray, fine sands with medium to coarse sands in 2 to 3-cm-thick beds.
150+	Mohawk Cliff	F	Massive, blue-gray, fining upwards sequence. Basal 5 cm composed of coarse sands, becoming fine to medium sands, and ultimately to silty clay. Blobs of coarser sand within may be burrows, few, scattered pebbles up to 1 cm, large, concoidal concretions might be in a layer, abrupt and wavy basal contact.
56	Mohawk Cliff	E	Irregularly bedded, deformed, blue and brown, rippled-fine sands and silts, ripples are 6X1 cm and 4.5X0.5 cm, in 6 to 15-cm-thick bedsets composed of laminations 1 to 2-mm-thick that are interbedded with fine to medium sand beds up to 1-cm-thick. Coarsens upsection becoming more sandy. Ripple indices are 6 and 9, which could be either wave or current ripples based on the ripple index (Reineck an…
37	Mohawk Cliff	D	Massive, blue-gray, silty clay with pods of fine sand (burrows?), one fine sandy irregular bed, abrupt and wavy basal contact.
25	Mohawk Cliff	C	Rippled, blue-gray, fine to medium sand in 2 to 5-cm-thick bedsets composed of 2 mm to 5-mm-thick beds, dish and pillar structures at base are 12 cm deep and 8 cm wide, irregular basal contact.
>10	Mohawk Cliff	B	Deformed, blue-gray, rippled, silty clay, ripples 26X4 cm and 16X3 cm, interbedded with beds of coarse sand and fine pebbles up to 7-cm-thick, coarsens upward, ripple indices are 6.5 and 5.3, which could be either wave or current ripples based on the ripple index (Reineck and Wunderlich, 1968) abrupt and wavy basal contact.
80	Mohawk Cliff	A	Wavy, parallel bedsets 2 to 4-cm-thick, composed of well-sorted, blue-gray, fine sands in 2 to 5-cm-thick beds, wavelengths up to 77 cm, some beds are irregular.
