# Supplementary material
Source: publisher figshare collection journal article supplement (https://gsapubs.figshare.com/articles/dataset/_/14787828)
Supplement: Supplementary file 1 [file 2]

This **Supplemental Material** accompanies Redwine, J.R., and Adams, K.D., 2021, A 740,000-yr-long Mohawk Lake record, Mohawk Valley, northeastern California, USA, in Starratt, S.W., and Rosen, M.R., eds., *From Saline to Freshwater: The Diversity of Western Lakes in Space and Time*, Geological Society of America Special Paper 536, [https://doi.org/10.1130/2021.2536\(21\)](https://doi.org/10.1130/2021.2536(21)).

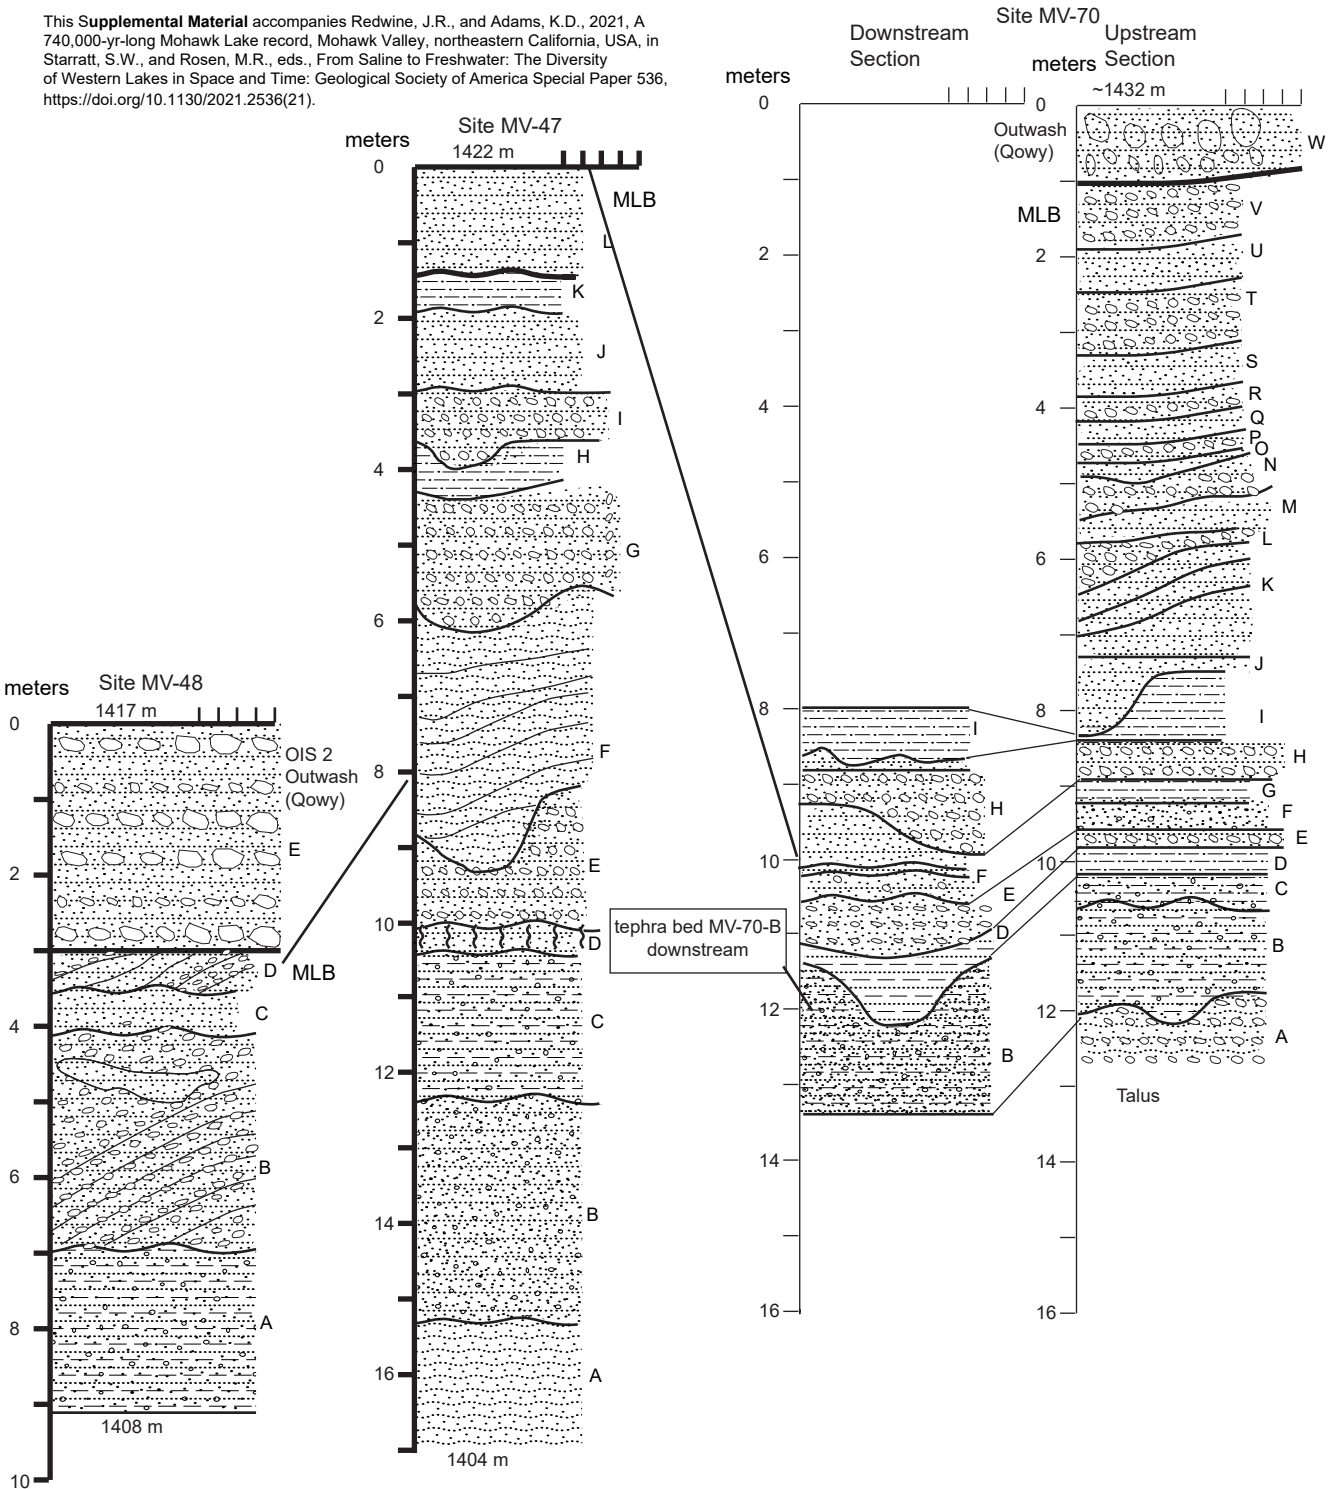

Figure S1. Stratigraphic columns for three sites within Jamison Creek. See Explanation of Units from Figure 11 for general unit description corresponding to patterns. Full unit descriptions associated with each stratigraphic unit (e.g., A) are in Table S1. See Figure 2 and 12 for locations and Figure 13B for photograph of site MV-70.

Figure S2

Site MV-45

Location of tephra bed MV-45.5 is estimated. Analyzed sample was collected nearby, not in this stratigraphic section. None of the glass collected within section MV-45 was clean enough to analyze.

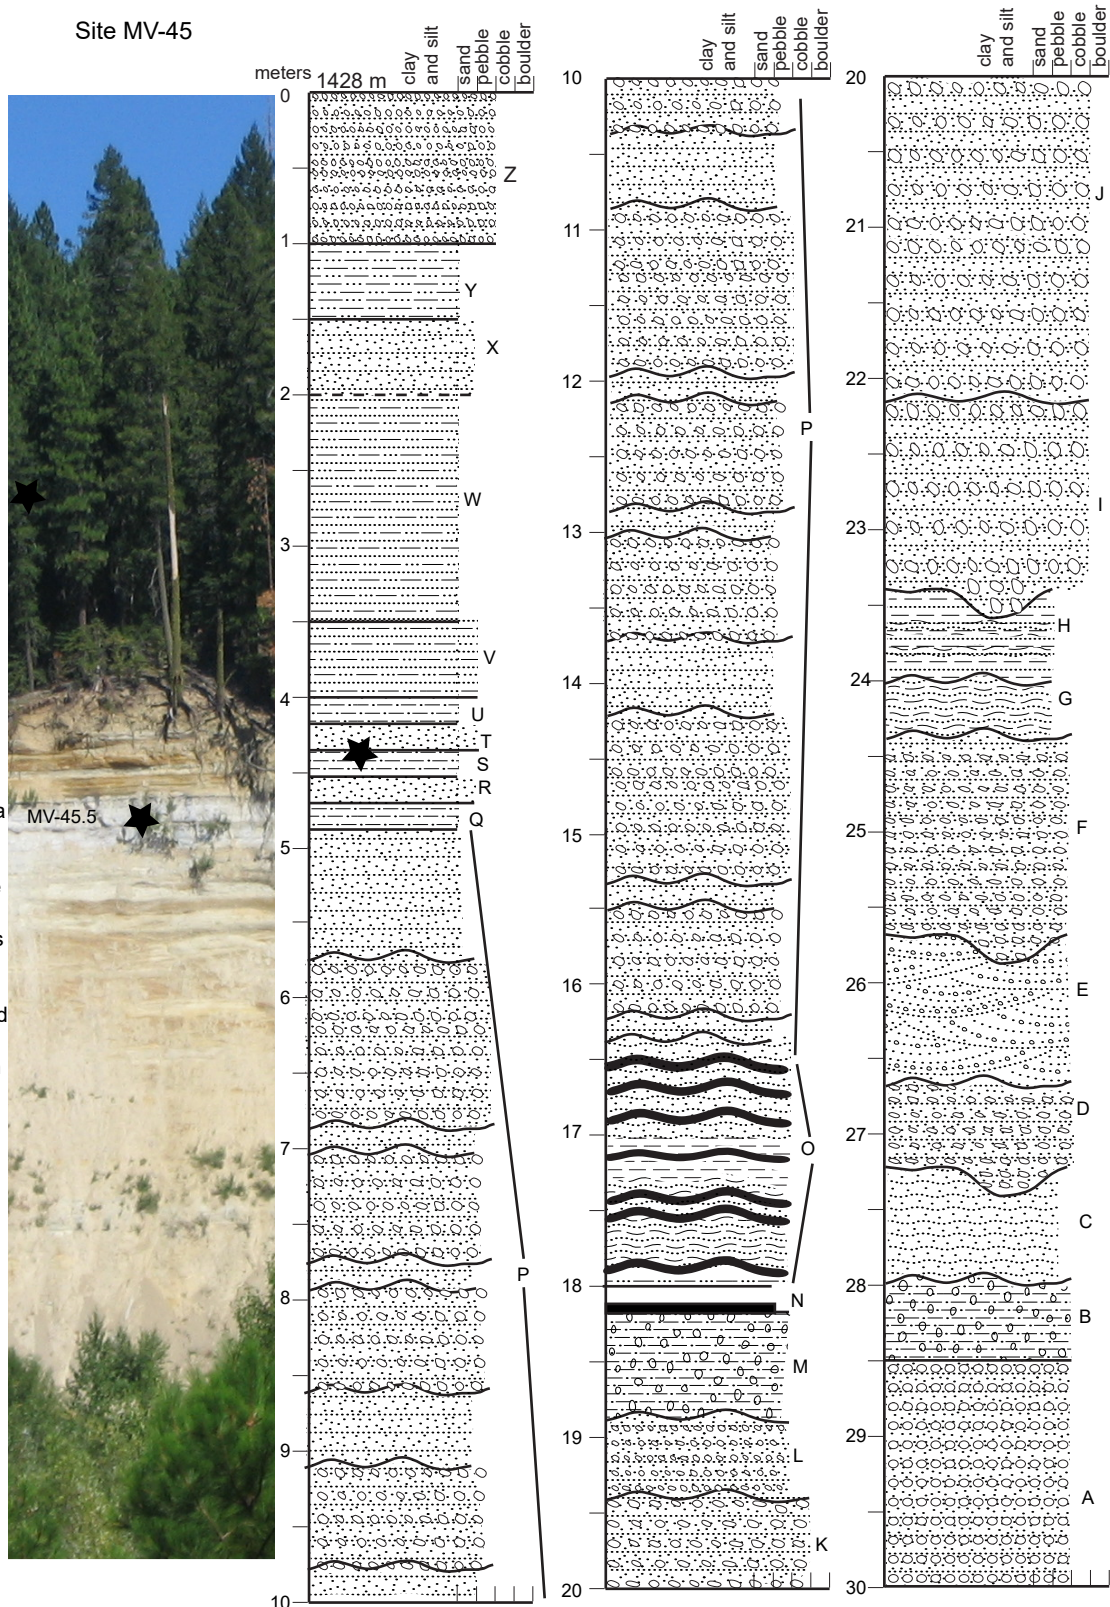

Figure S2. Stratigraphic column and photograph of site MV-45. See Explanation of Units from Figure 11 for general unit description corresponding to pattern. Full unit descriptions associated with each stratigraphic unit (A-Z) are in Table S1. See Figures 2 and 12 for locations and Figure 13A for photograph.
